# Supplementary material for: Influence of tidal volume on pulse pressure variation and stroke volume variation during experimental intra-abdominal hypertension
Source: Springer Nature journal article supplement (doi:10.1186/s12871-015-0105-x), 2015-09-22

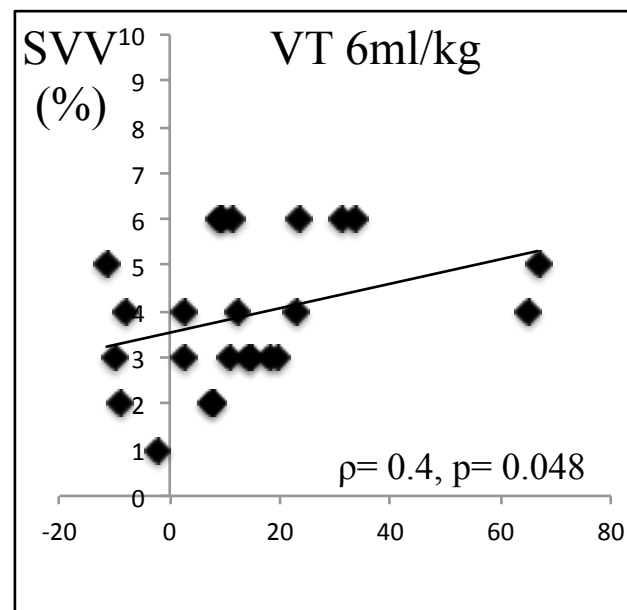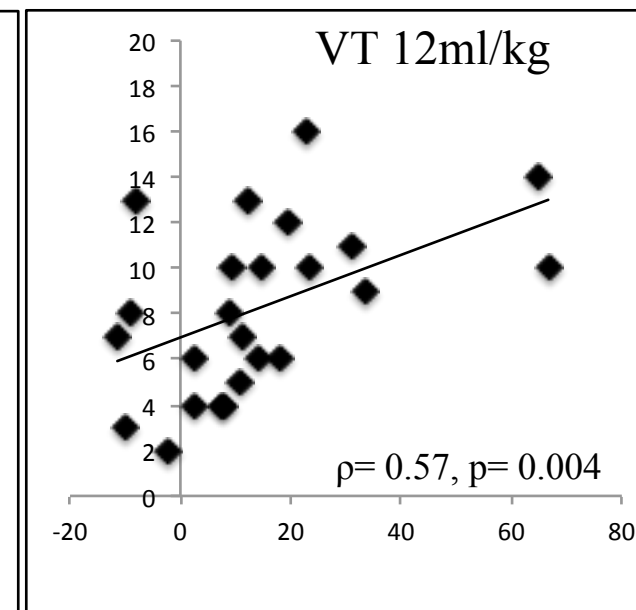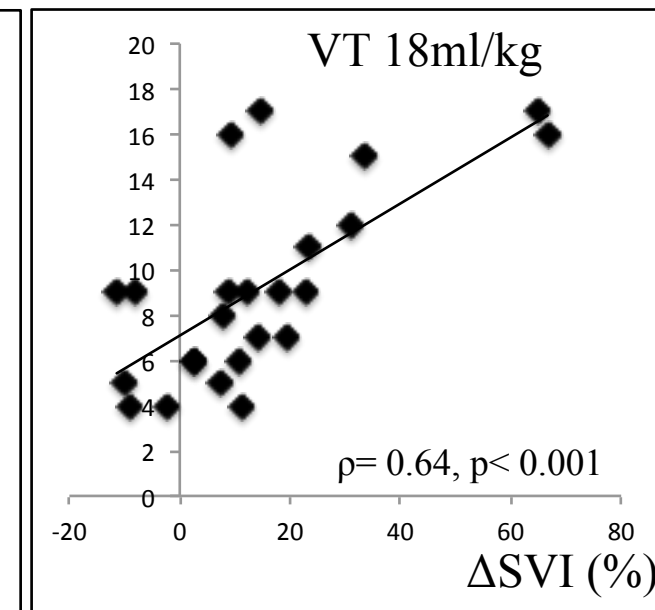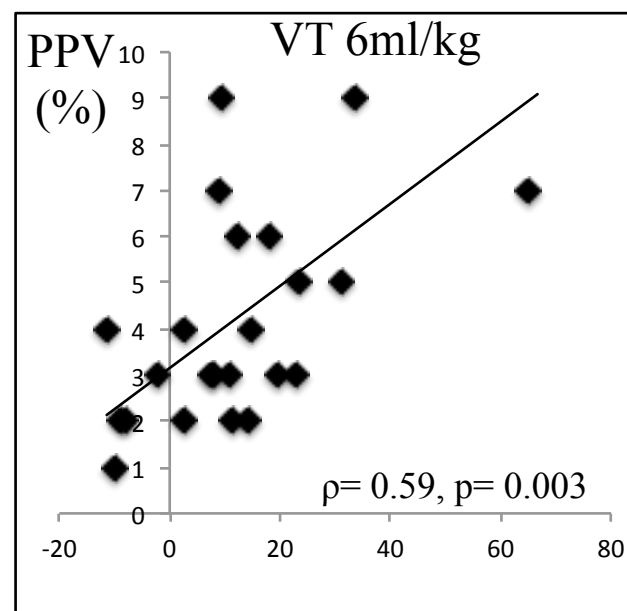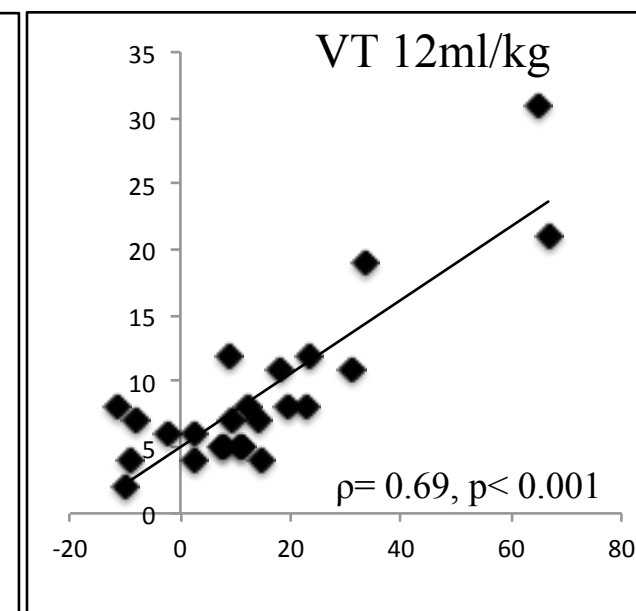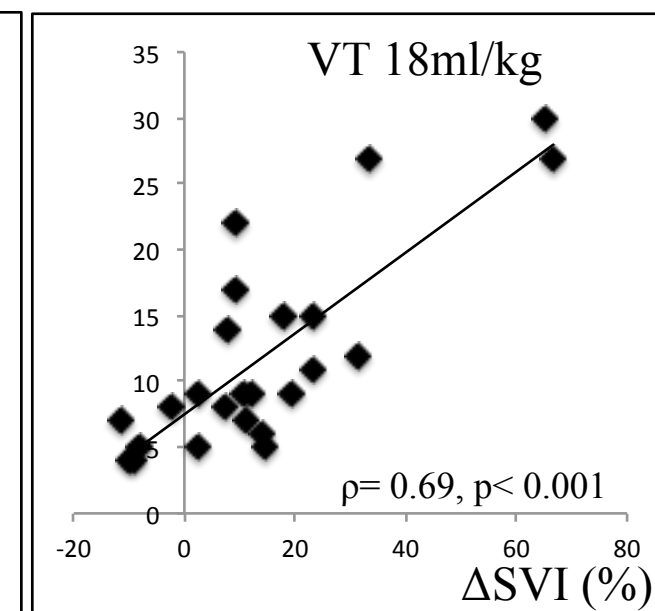

Supplement: MOESM2 [file 9736452]
